# Supplementary material for: Improving Statistical Certainty of Glycosylation Similarity between Influenza A Virus Variants Using Data-Independent Acquisition Mass Spectrometry
Source: PubMed Central journal article supplement (PMC9593740; doi:10.1016/j.mcpro.2022.100412), 2022-09-11

**Improving statistical certainty of glycosylation similarity between influenza A virus variants using data-independent acquisition mass spectrometry**

Deborah Chang<sup>1</sup>, Joshua Klein<sup>2</sup>, William Hackett<sup>2</sup>, Mary Rachel Nalehua<sup>2</sup>, Xiu-Feng Wan<sup>3,4,5,6</sup>, Joseph Zaia<sup>1,2</sup>

Supplementary File 3. Annotated tandem mass spectra for glycopeptides that were positively identified in the DDA data compared to spectra that failed to pass the scoring threshold in the DIA data.

SWZ mutant cell pp. 2-3

SWZ mutant egg pp. 4-7

SWZ wild type cell pp. 8-11

SWZ wild type egg pp. 12-21

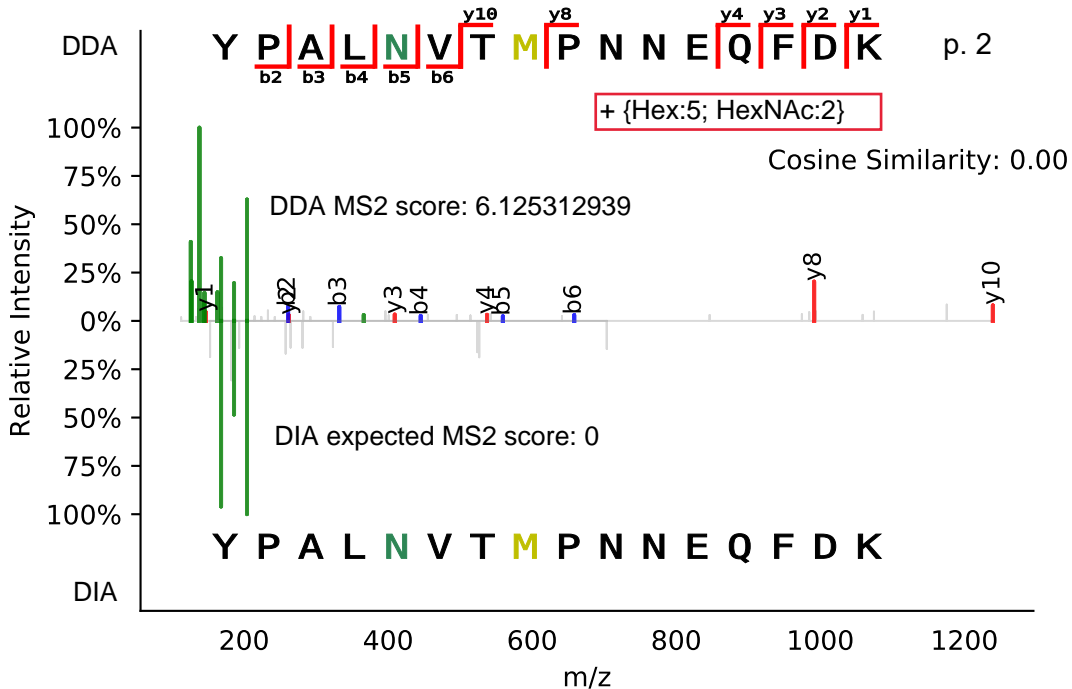

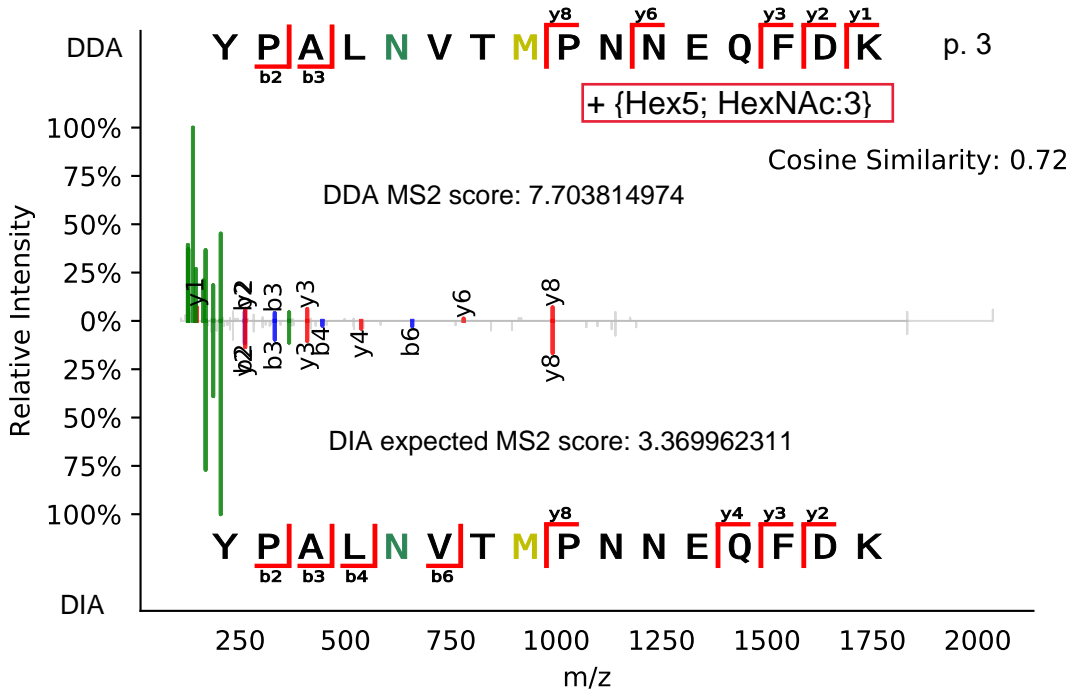

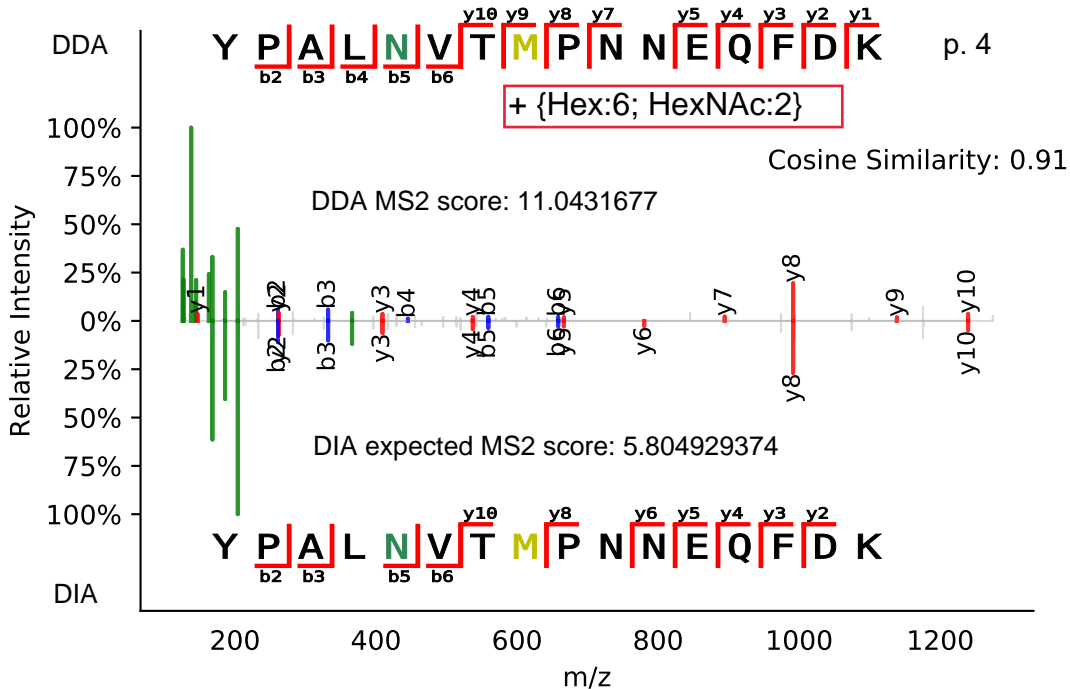

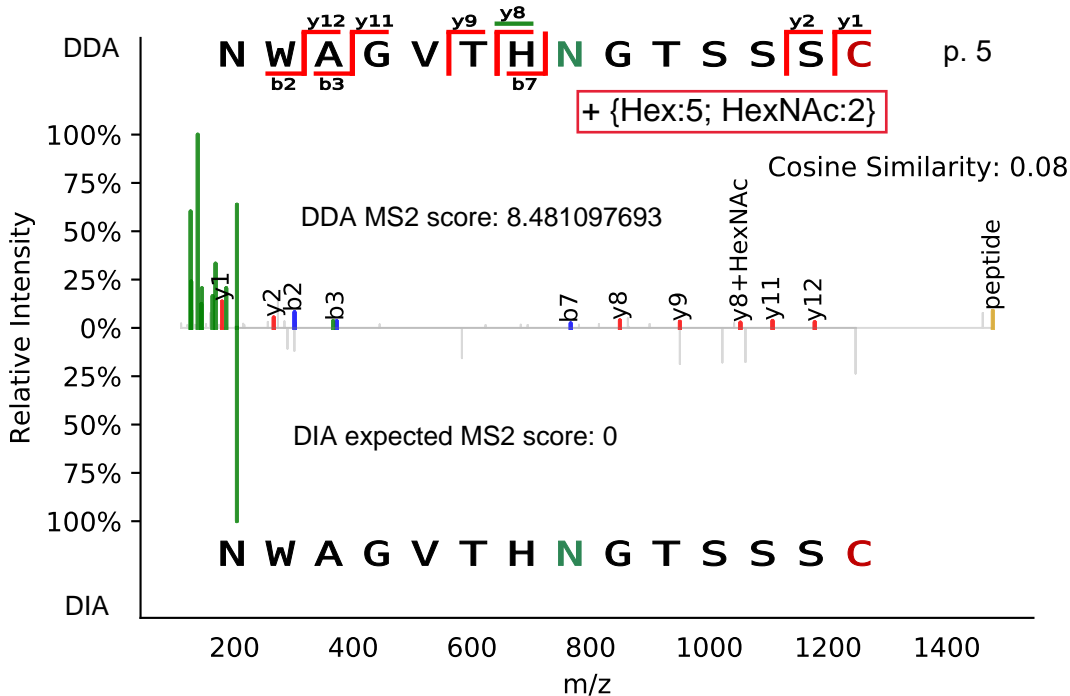

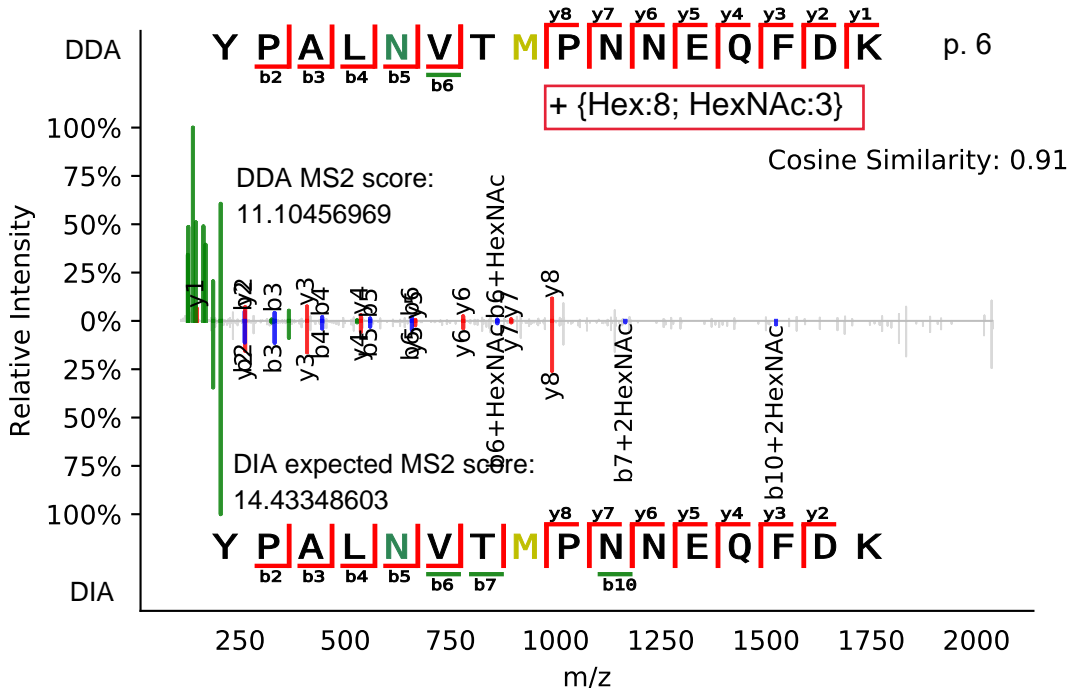

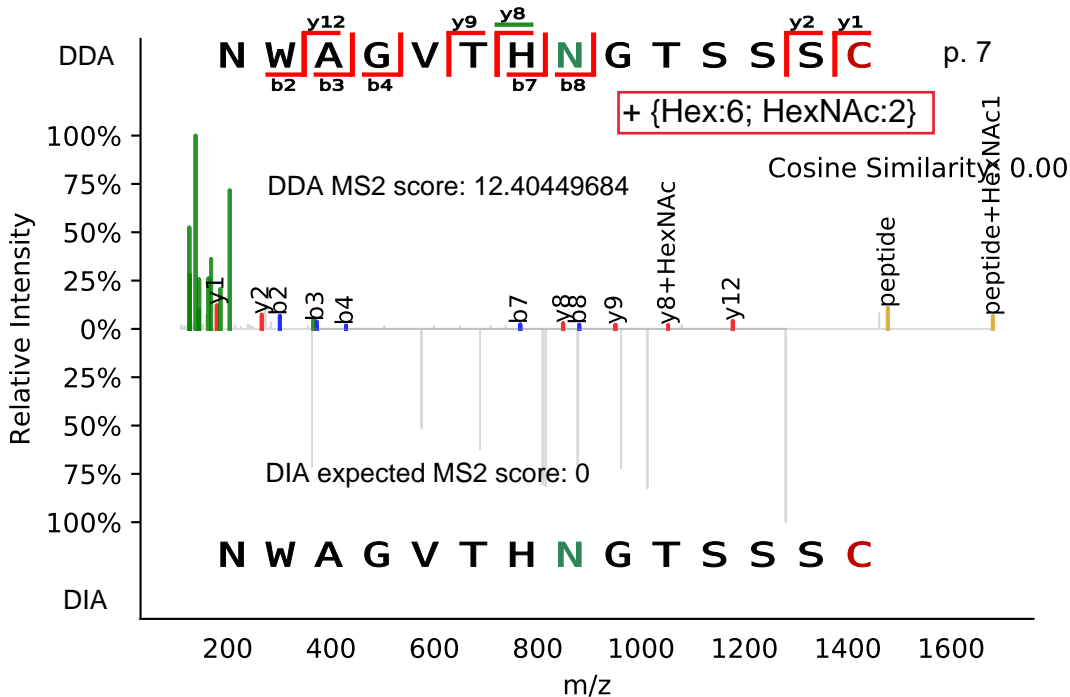

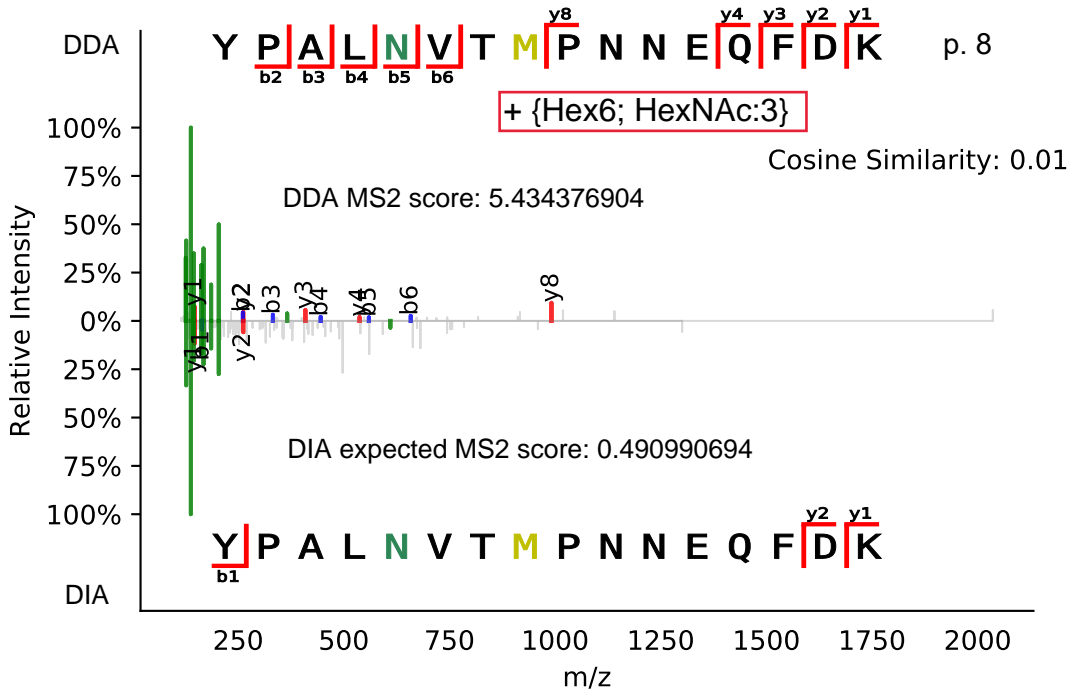



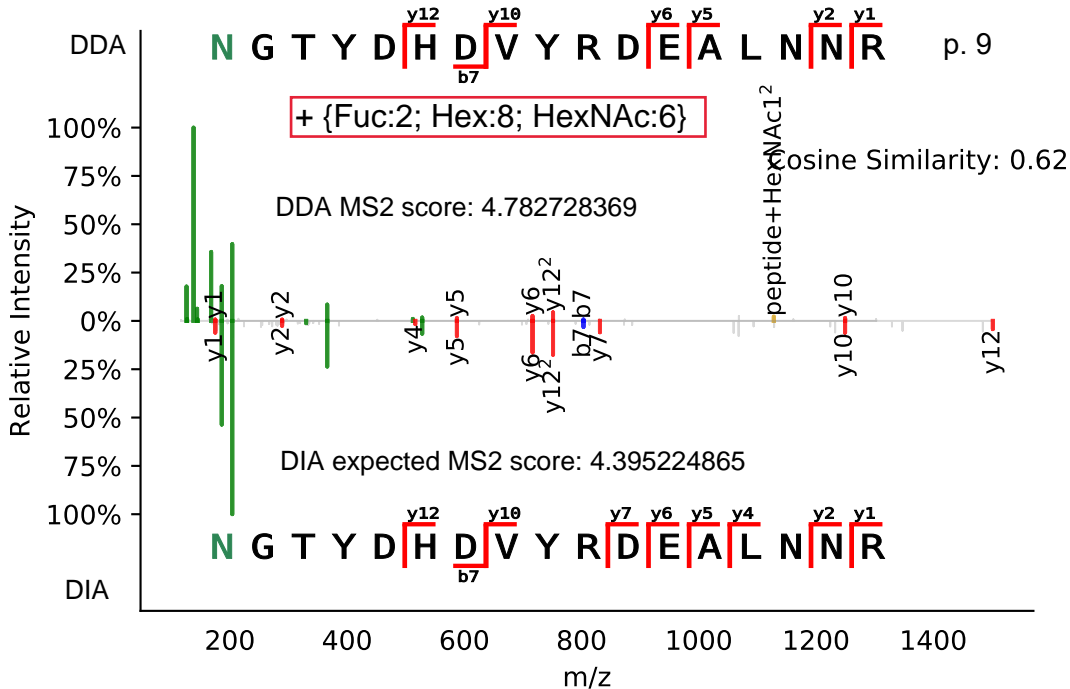

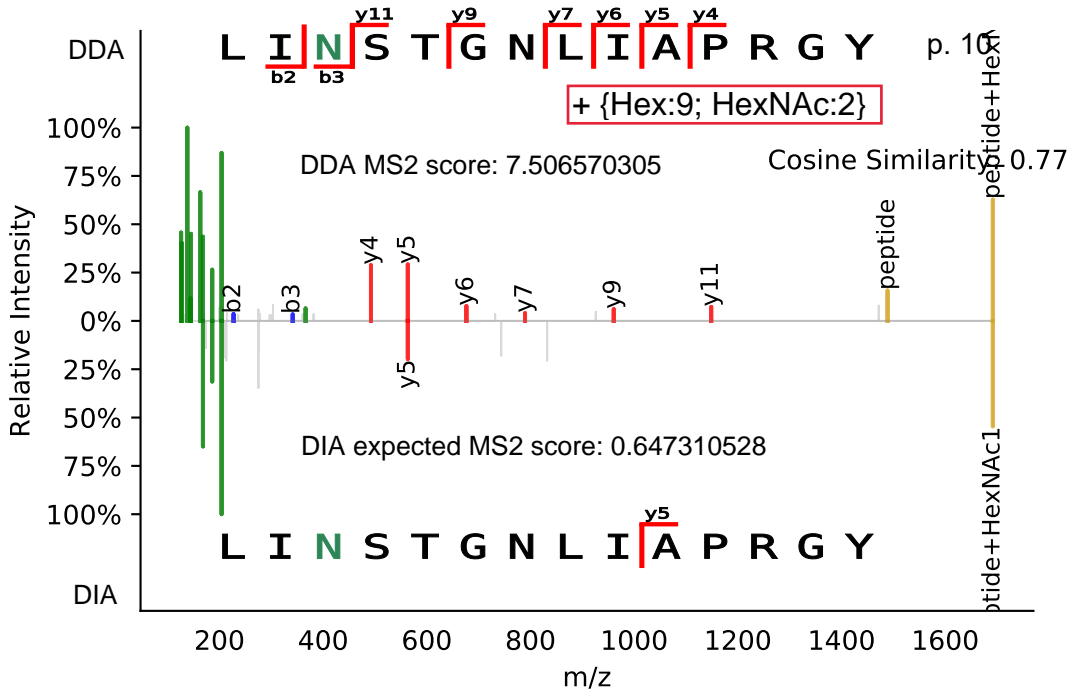

Relative Intensity

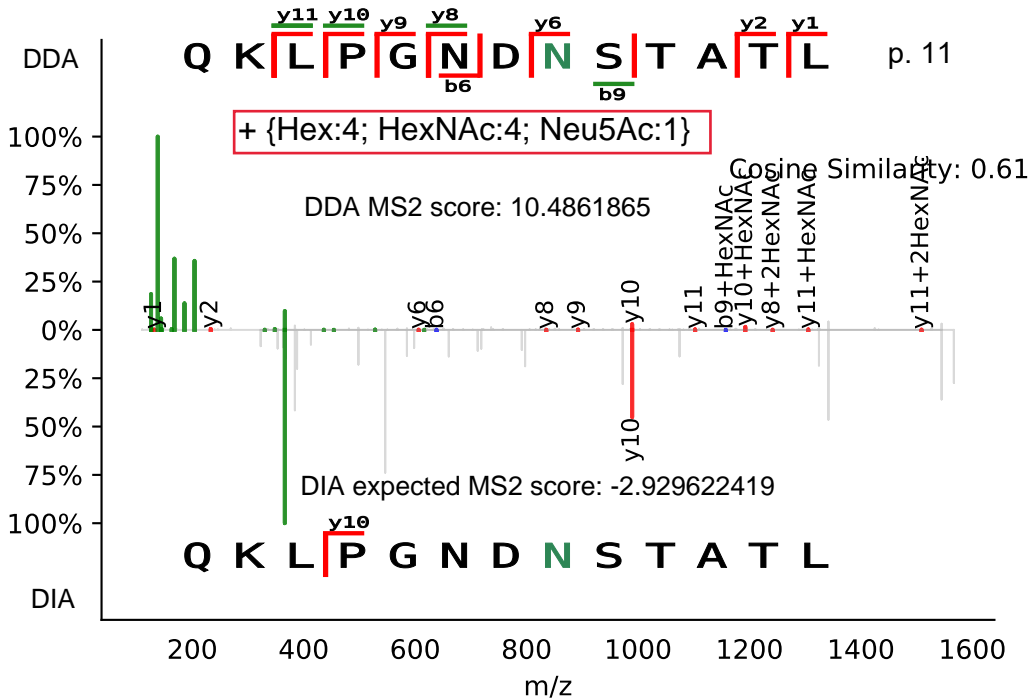

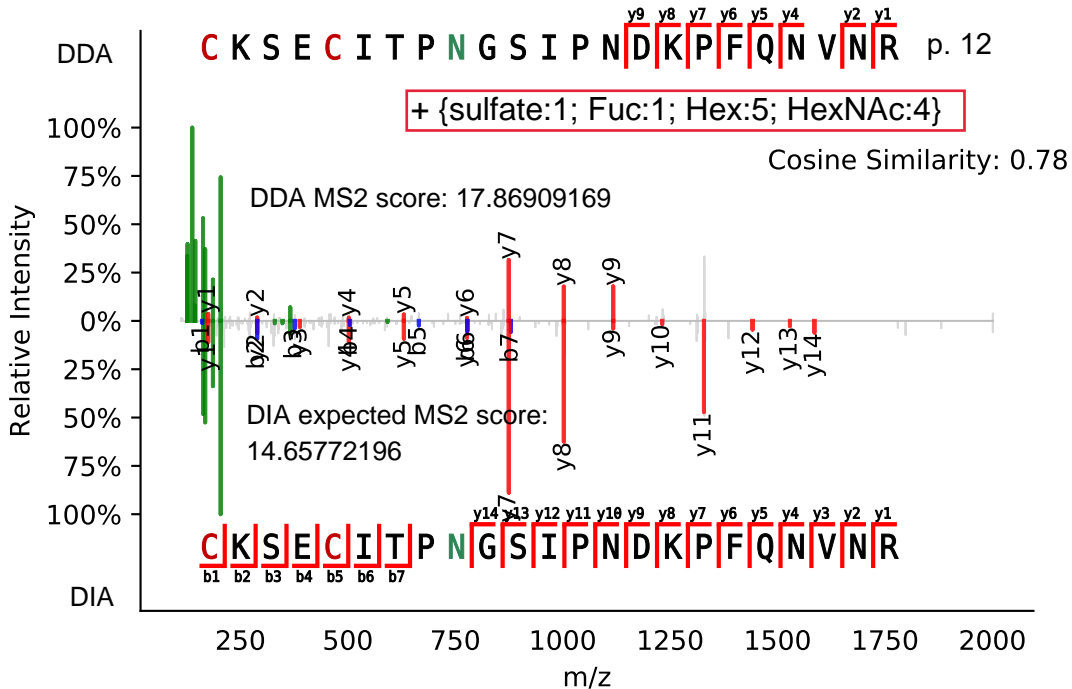

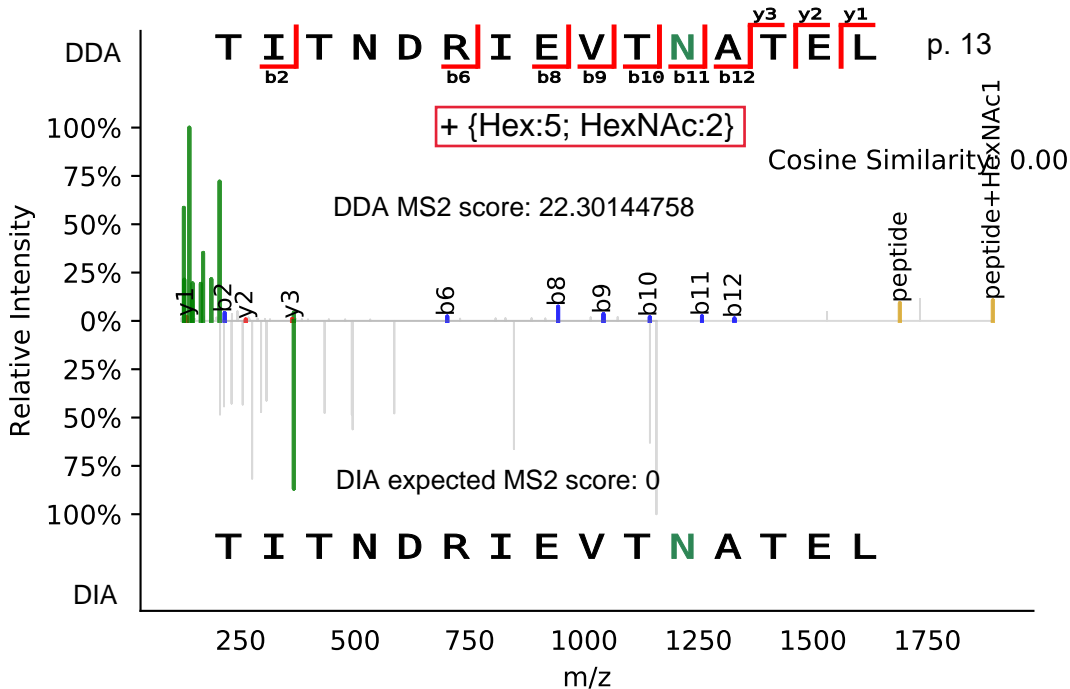

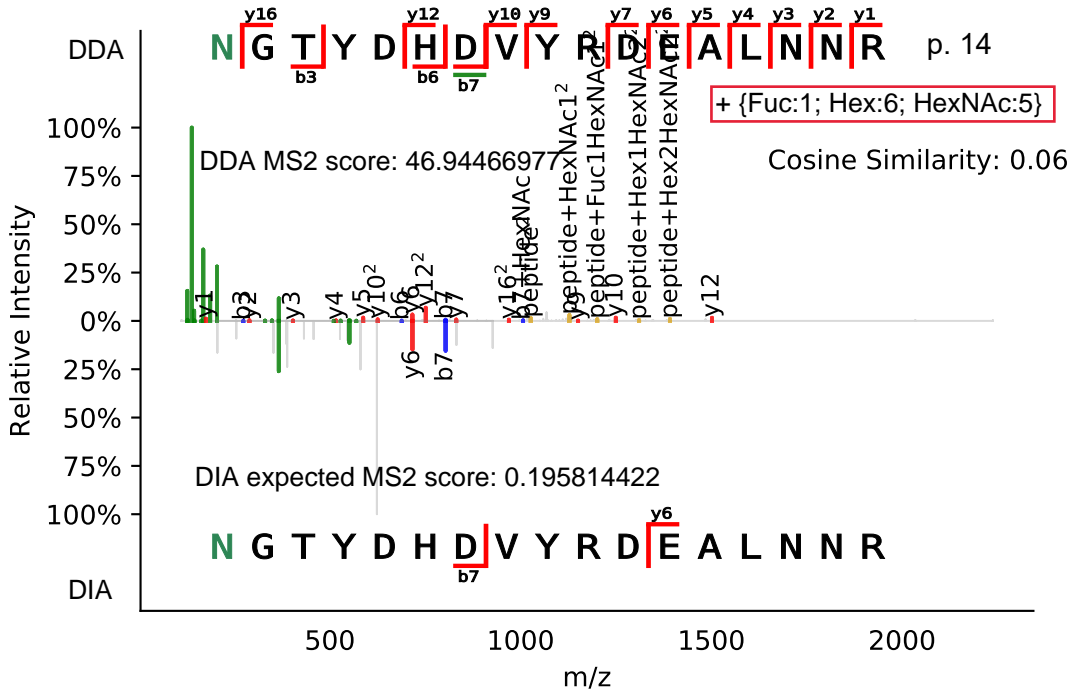



Relative Intensity

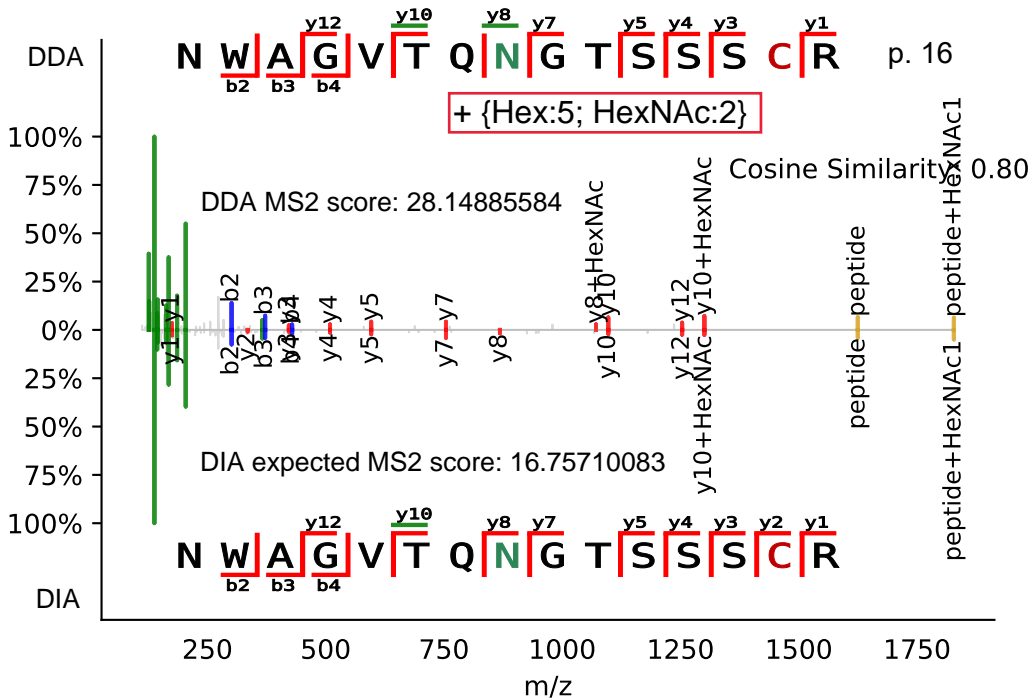



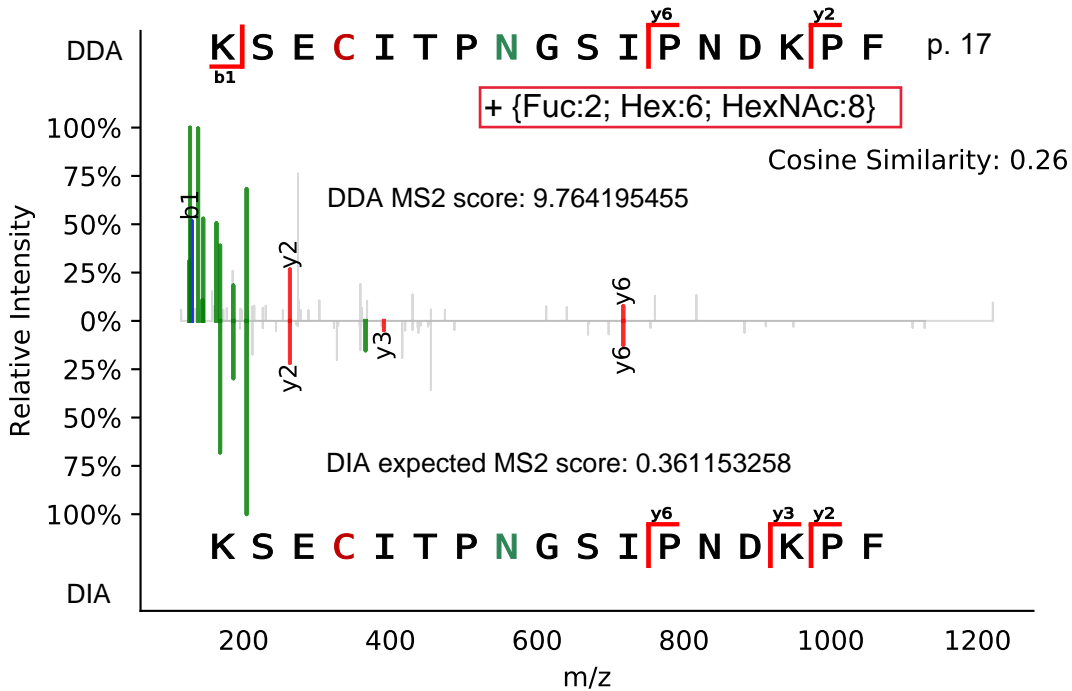

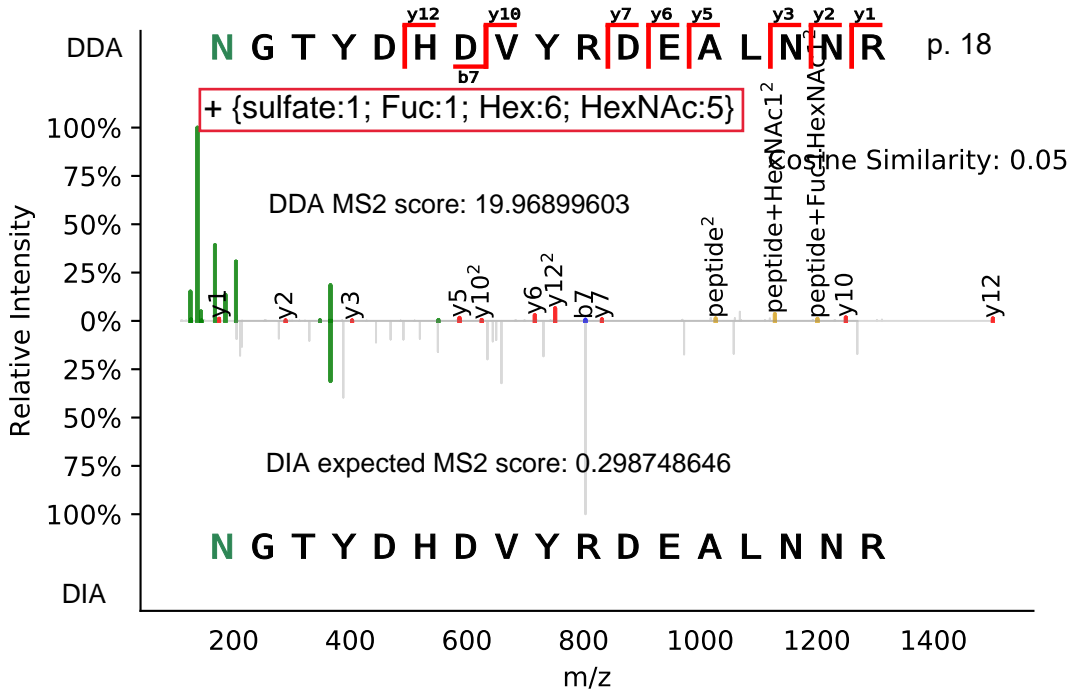

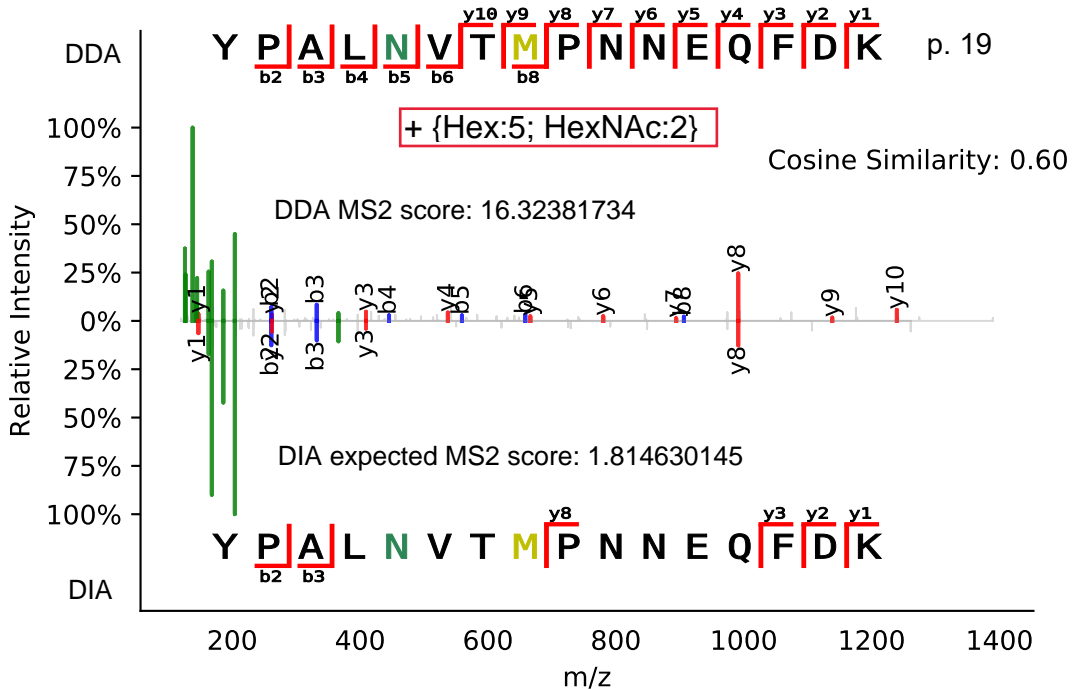

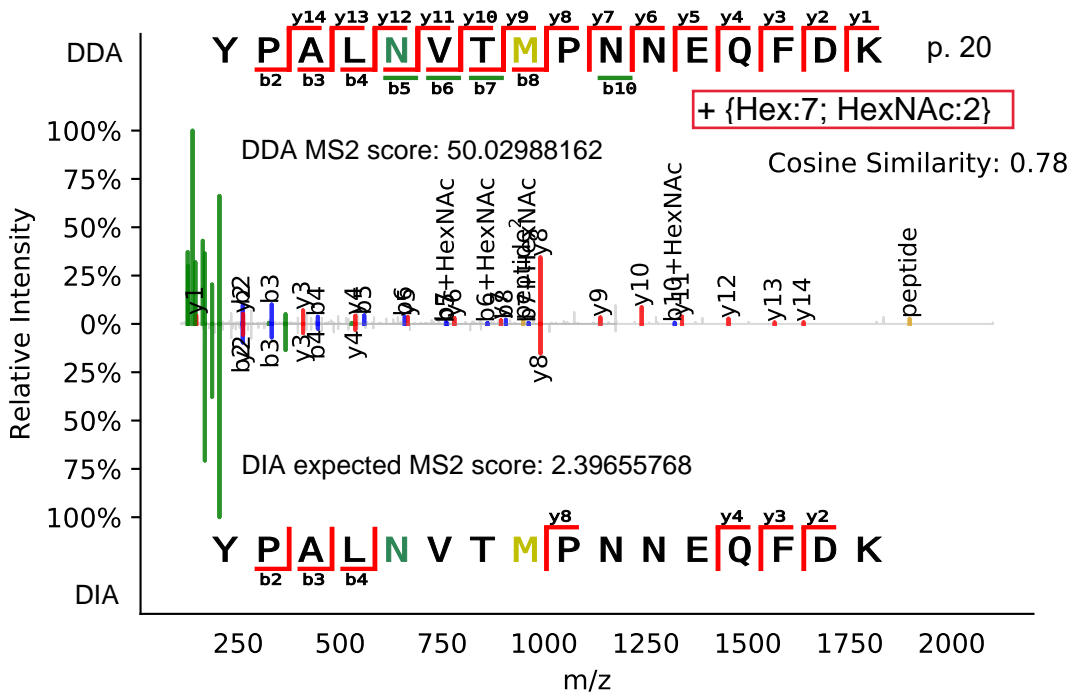

Relative Intensity

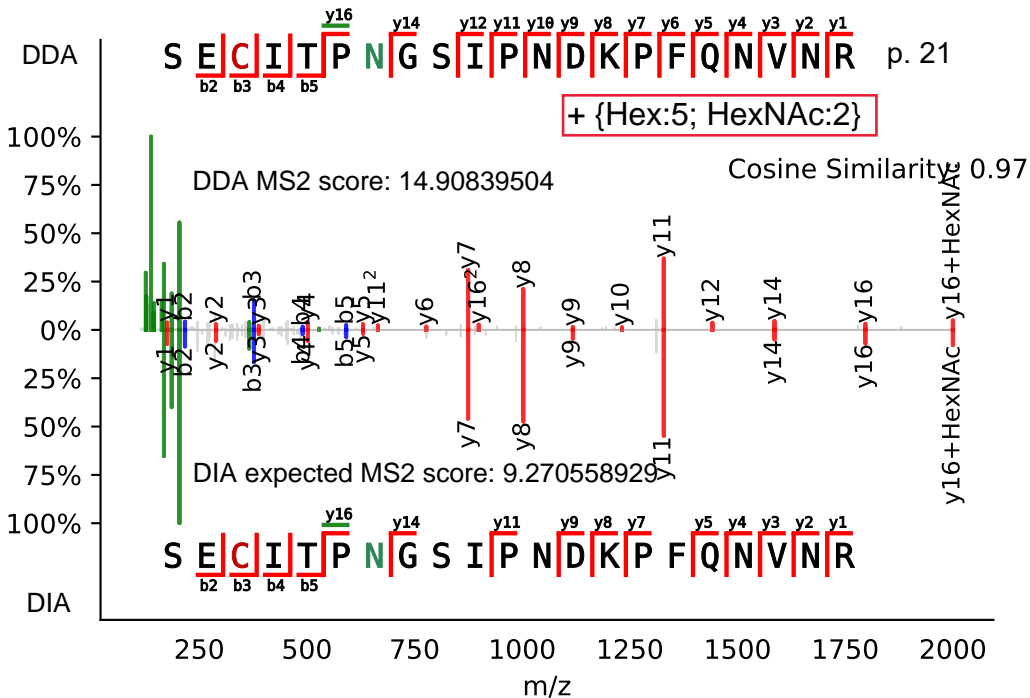

Supplement: mmc4.pdf [file mmc4.pdf]
